1 Title  
2 **Effect of an enhanced public health contact tracing intervention on the secondary**  
3 **transmission of SARS-CoV-2 in educational settings: the four-way decomposition**  
4 **analysis**

5  
6 Olivera Djuric<sup>1,2\*</sup>, Elisabetta Larosa<sup>3</sup>, Mariateresa Cassinadri<sup>3</sup>, Silvia Cilloni<sup>3</sup>, Eufemia  
7 Bisaccia<sup>3</sup>, Davide Pepe<sup>3</sup>, Laura Bonvicini<sup>1</sup>, Massimo Vicentini<sup>1</sup>, Francesco Venturelli<sup>1</sup>, Paolo  
8 Giorgi Rossi<sup>1</sup>, Patrizio Pezzotti<sup>4</sup>, Alberto Mateo Urdiales<sup>4</sup>, Emanuela Bedeschi<sup>3</sup>, and the  
9 Reggio Emilia Covid-19 Working Group.

10

11 Author affiliations:

12 <sup>1</sup> Epidemiology Unit, Azienda Unità Sanitaria Locale – IRCCS di Reggio Emilia, Reggio  
13 Emilia, Italy

14 <sup>2</sup> Centre for Environmental, Nutritional and Genetic Epidemiology (CREAGEN), University  
15 of Modena and Reggio Emilia, Italy

16 <sup>3</sup> Public Health Unit, Azienda Unità Sanitaria Locale-IRCCS di Reggio Emilia, Reggio  
17 Emilia, Italy.

18 <sup>4</sup> Istituto Superiore di Sanità, Rome, Italy

19

20 \*Corresponding author:

21 Olivera Djuric, MD, PhD

22 Azienda Unità Sanitaria Locale – IRCCS di Reggio Emilia, Reggio Emilia, Italy

23 Email: [olivera.duric@ausl.re.it](mailto:olivera.duric@ausl.re.it)

24 [Tel: +390522335278](tel:+390522335278)

25 ORCID: 0000-0002-8574-5938

26

27

28 **Abstract**

29 **Background:** We assessed the impact of testing contacts immediately instead of at the end of  
30 quarantine on the transmission of SARS-CoV-2 in schools in Reggio Emilia Province.

31 **Methods:** We analysed surveillance data on notification of COVID-19 cases in schools  
32 between 1 September 2020 and 4 April 2021.

33 **Results:** Median tracing delay decreased from 7 to 3.1 days and the percentage of the known  
34 infection source increased from 34% to 54.8% (IRR 1.61 1.40-1.86). Implementation of  
35 prompt contact tracing was associated with a 10% decrease in the number of secondary cases  
36 (excess relative risk, EER -0.1 95%CI -0.35 to 0.15). Knowing the source of infection of the  
37 index case led to a decrease in secondary transmission (IRR 0.75 95% CI 0.63-0.91) while  
38 the decrease in tracing delay was associated with decreased risk of secondary cases (1/IRR  
39 0.97 95%CI 0.94-1.01 per one day of delay). The direct effect of the intervention accounted  
40 for the 29% decrease in the number of secondary cases (EER -0.29 95% -0.61 to 0.03).

41 **Conclusions:** Prompt contact testing in the community seems to reduce the time of contact  
42 tracing and increases the ability to identify the source of infection in school outbreaks. Yet,  
43 observed differences can be also due to differences in the force of infection and to other  
44 control measures put in place.

45 **Funding:** This project was carried out with the technical and financial support of the Italian  
46 Ministry of Health – CCM 2020 and Ricerca Corrente Annual Program 2023.

47 **Keywords:** COVID-19, schools, attack rate, contact tracing, mediation analysis

48

49

50

## 51 **Background**

52 Closure of educational institutions was one of the non-pharmacological infection control  
53 measures often adopted during the pandemic of SARS-CoV-2, mostly based on the temporal  
54 coincidence between schools reopening and COVID-19 outbreaks in some countries and the  
55 concern regarding potential school-to-home transmissions of the virus from students to more  
56 susceptible family members.

57 Evidence on the SARS-CoV-2 transmission in educational settings indicates not only that  
58 schools opening and closing have a small impact on the increase or decrease of SARS-CoV-2  
59 rates in the population, but that transmission is even lower in schools than that in the general  
60 population [1-3]. However, the risk of in-school SARS-CoV-2 transmission is still considered  
61 high, making prevention measures vital to restoring in-person learning [4,5]. The control of  
62 infection in school-age children became even more critical after the introduction of mass  
63 vaccination, which reduced transmission between adults, and with the spread of the Omicron  
64 variant, which has much higher transmissibility in indoor settings.

65 Timely reporting of COVID-19 cases to the health authorities and case investigation,  
66 followed by timely testing, contact tracing, and isolation, remain crucial to allow safe  
67 resumption of in-presence activities. Contact tracing practices have been subject to changes  
68 over time along with emerging evidence and the introduction of the vaccine. While the  
69 Centers for Disease Control and Prevention (CDC) recommends that people get tested at least  
70 after five days from close contact with a person with COVID-19 [6,7], the European Centre  
71 for Disease Prevention and Control (ECDC) recommends testing all high-risk exposure  
72 contacts, whether vaccinated or not, as soon as possible after they have been identified to  
73 allow for further contact tracing [4,5]. Regardless of this, it has always been acknowledged

74 that isolation of contacts is effective if initiated shortly after confirmation of the index case  
75 since the delay in isolation of contacts has a major impact on the transmission of the virus [8].

76 Enhanced contact tracing, such as backward contact tracing (BCT), has also been  
77 recommended to facilitate the identification of the primary case, also called “source” or  
78 “original” case from which an index case acquired his/her infection [5,7]. The rationale  
79 behind this recommendation is to stop chain transmission that originates from this relatively  
80 small proportion of primary cases usually responsible for a large proportion of transmission.

81 By extending contact tracing window or performing source investigation, BCT aims to  
82 identify asymptomatic cases that are the actual source of newly detected (index) cases.  
83 Modelling studies show that primary cases generate 3-10 times more infections than a  
84 randomly chosen case [9]. These cases would not have otherwise been identified and, in the  
85 case of educational settings, would not have been linked to school investigation. Given that  
86 BCT tend to “catch” infection sources at the end of their infectious period, if the BCT is  
87 highly susceptible to testing and contact tracing delays, therefore it is meaningful only in the  
88 presence of prompt tracing of contacts [10].

89 Starting from 27 November 2020, the local health authority of Reggio Emilia, Italy, improved  
90 contact tracing protocols by introducing a prompt molecular tests for all contacts, whether  
91 symptomatic or asymptomatic, at the beginning of quarantine (test to trace), with the aim to  
92 identify all possible sources of infection in asymptomatic contacts. Before the intervention,  
93 contacts of index cases were only tested at the end of the isolation period (test to release). In  
94 this way, primary (asymptomatic) cases were not diagnosed or were diagnosed very late in  
95 their infection course and, given that they were not attending school since they were isolated,  
96 they were not indicated as a school contact until one of the school contacts become  
97 symptomatic (Figure 1). Given that a large part of the infections in students is asymptomatic  
98 or paucisymptomatic, they are often identified when an adult in the same household presents

99 symptoms. Prompt testing of all contacts in community allows the timely identification of  
100 positive children/teachers who may be primary cases in school outbreaks. Thus, allowing a  
101 prompt investigation in the school setting to start.

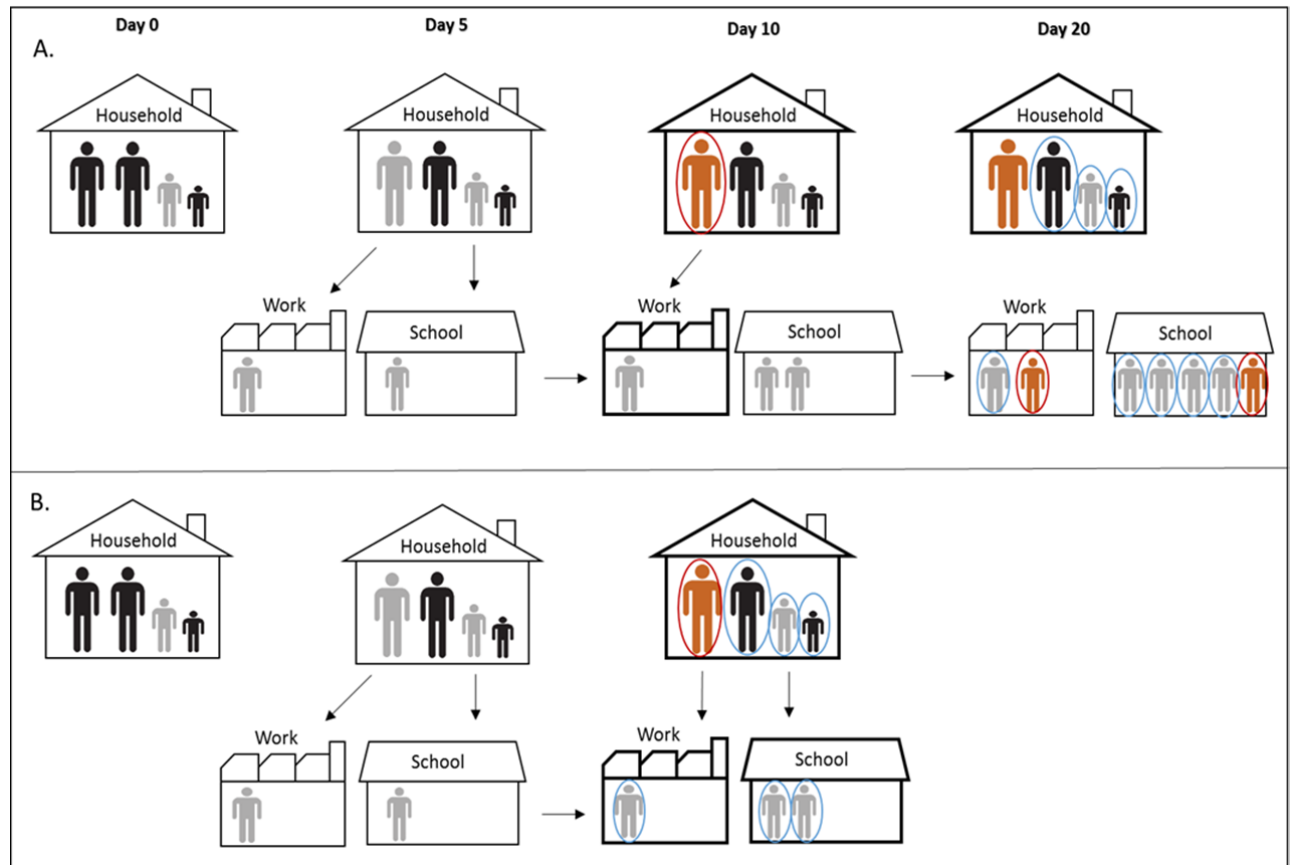

102

103 **Fig. 1.** Simplified illustration of the pre and post intervention scenarios. In panel A we report  
104 the scenario without prompt contact testing in community and its effect on the SARS-CoV-2  
105 transmission in educational setting. Day 0: One of the children in a household became  
106 infected (primary case) but asymptomatic (grey). Day 5: One parent and one classmate  
107 became infected, also asymptomatic (grey). Day 10: The infected parent became  
108 symptomatic (orange), tested positive (red circle) and considered as index case of the  
109 household. Entire family is quarantined (bold line) but not tested. Meanwhile, primary case  
110 transmit infection further to two other classmates while index case transmit infection to a co-  
111 worker. Classmates of the primary case are not tested because they are not identified as  
112 school contacts due to late testing of the household contacts. The contact co-worker is  
113 isolated but not tested promptly. Day 20: Family members of the index case are tested at the  
114 end of the quarantine. One positive classmate of the primary case became symptomatic,  
115 tested positive and considered an index case in the school cluster given that the classmates  
116 were not considered contacts of the primary case since he was already isolated. Other  
117 classmates are tested only when an index case occur. Panel B illustrates the scenario with  
118 prompt contact testing in community. Day 10: The infected parent became symptomatic,  
119 tested positive and entire family is quarantined and tested at the beginning of quarantine.

120 Primary case is identified promptly; his classmates are identified as contacts, tested and  
121 isolated preventing further transmission of the virus.  
122

123 This study aimed to estimate the impact of changing contact tracing intervention from testing  
124 contacts at the end of quarantine to testing contacts immediately, on the secondary  
125 transmission of SARS-CoV-2 in educational settings in Reggio Emilia Province. To better  
126 understand the mechanism of the possible impact that the intervention has on secondary  
127 transmission, we assessed whether this association is mediated by two process indicators,  
128 tracing delay and known source of infection of the index case, which was the actual target of  
129 the intervention, bearing in mind limits of the before-and-after design of this study conducted  
130 in a period when several changes could confound the results.

## 131 **Methods**

### 132 *Design and setting*

133 In the present study, population-based surveillance data were analysed including 1 604  
134 consecutive positive cases confirmed with RT-PCR for SARS-COV-2 infection between 1  
135 September 2020 and 4 April 2021 in Reggio Emilia Province that led to an epidemiological  
136 investigation among children and adolescents (0–19 years old) or school staff in 1 884 classes  
137 who may have been exposed or in contact with positive cases at school.

138 In Reggio Emilia Province (531 751 inhabitants, Emilia Romagna, Northern Italy) there are  
139 approximately 95 000 inhabitants from 6 months-olds to 19-year-olds attending infant-toddler  
140 centres (ages 0-3), preschools (ages 3-5), primary schools (ages 6-10), middle schools (ages  
141 11-13) and high schools (ages 14-19), and about 12 000 teachers/ school staff members.

142 During the study period, there were two peaks of infections: in November 2020 and in  
143 February/March 2021 (Supplementary file 1) [11]. After the school reopening on 1 September  
144 2020 for preschool and remedial courses and, on 15 September 2020, for the regular school

145 year, in-class learning was in place until 26 October 2020 when policies to reduce crowding  
146 especially in high schools were introduced (reducing the in-class time by 50% to 75%) as  
147 were several short closures in the periods of highest incidence. In addition, because of the  
148 high circulation of the virus, the Christmas school holidays were extended to the second week  
149 of January (from 20 December to 11/15 January). Another lockdown led to the closing of  
150 schools on 3 March 2021. Only infant-toddler centres and preschools, schools that require  
151 laboratory work, and schools with pupils with disabilities or special needs continued in-  
152 presence didactic activities.

153 Infection control measures in place during the study period were previously described in  
154 detail [12-14].

### 155 ***Intervention***

156 Starting from 27 November 2020, the local health authority improved contact tracing  
157 protocols and introduced immediate molecular tests for all contacts, whether symptomatic or  
158 asymptomatic, at the beginning of quarantine, with the aim to identify all possible sources of  
159 infection in asymptomatic contacts and facilitate backward tracing [13]. This strategy was  
160 applied to all contacts, independently from the setting of infection, including all household  
161 members of sporadic cases, and particular attention was given to testing of children and  
162 adolescents because they were most commonly asymptomatic (Supplementary file 2). This  
163 strategy was explicitly thought to correctly identify in a timely manner the contacts of  
164 asymptomatic cases before they started the quarantine. Testing only at the end of quarantine  
165 guarantees a safe return to the community of contacts and to identify secondary transmission  
166 in the cluster, but, by definition, assumes that the asymptomatic cases are secondary cases  
167 and became infectious during the quarantine and thus could not have contacts.

168 ***Outcome and variables of interest***

169 The main outcome was the number of secondary cases per class. Two process indicators of  
170 contact tracing performance were considered: the first one, tracing delay, was calculated as  
171 the time from swab positivity of the index case to the date on which the swab for (the  
172 majority of) classmates was scheduled; the second indicator was the proportion of index  
173 cases who had close contact with a known COVID-19 case in the ten days before the onset of  
174 symptoms or diagnosis. This indicator, called “the known source of infection of the index  
175 case”, is a proxy of backward contact tracing success which should reflect the extent to which  
176 school index cases were tested and linked to the school investigation because of a known  
177 contact with a positive person. Delay in the diagnosis of the index case was also calculated,  
178 as the number of days between symptom onset and the date of swab positivity, but this  
179 indicator is expected to only be marginally influenced by contact tracing strategies.

180 ***Definitions and assumptions***

181 The first case that tested positive (considering the date on which the swab was done) per class  
182 was considered an index case. If more than one case in a class tested positive on the same  
183 day, the one with the earliest symptom onset was considered the index case. The same class  
184 can be included more than once in the analysis because it may have been involved in more  
185 than one investigation during the study period.

186 When more than one class was included in a between-class transmission, index cases  
187 belonging to different classes had shared exposures, or there was a single index case for more  
188 than one class (usually, but not only, when the index case was a teacher), this was considered  
189 a multi-class cluster.

190 Overall attack rate was calculated by dividing the number of cases by the population at risk;  
191 i.e., classmates, teachers/staff who had had close contact with the index case in a period



192 starting from 48h before symptom onset of the symptomatic index case and, for  
193 asymptomatic cases, 48h before diagnosis.

194 If a classmate was already in isolation prior to symptom onset or swab positivity of the index  
195 case, due to contact with a positive person or re-entry from abroad, he/she was excluded from  
196 the denominator. Any student or staff who refused to perform a swab was excluded from the  
197 denominator.

#### 198 *Data sources*

199 Following the identification and notification of a COVID-19 case, qualified Public Health  
200 Department (PHD) personnel performed a detailed field investigation and managed the index  
201 case, and identified contacts according to the regional recommendations and control measures  
202 in place. Comprehensive surveillance data containing information on index cases, contacts,  
203 school and class characteristics, swabs performed, secondary cases, and measures undertaken,  
204 were collected by PHD, and stored in electronic forms. Each case and cluster was re-  
205 abstracted by a study investigator and checked for consistency and plausibility. Missing data  
206 were imputed from the COVID-19 Surveillance Registry software and a de-identified  
207 research database was constructed for the analysis.

#### 208 *Statistical analysis*

209 During the study period many factors that could influence secondary transmission in schools  
210 occurred, including change in overall incidence, changes in in-school and out-of-school  
211 (especially transports and leisure-time activities) control measure, time of in-person and  
212 distance teaching, and the spread of the Alpha variant. Therefore, simply measuring the  
213 outcome before and after the intervention would be surely biased and would not allow any  
214 causal inference.

215 To test the hypothesis that the contact tracing strategy in the community had an impact on the  
216 secondary case transmission in schools, we first assessed if the introduction of the new  
217 strategy actually changed the tracing process analysing the trend of the timeliness of testing  
218 and the proportion of index cases with a known source of infection during the study period.  
219 The class was the statistical unit for analyses. Median testing delay and the proportion of  
220 index cases with the known source of infection were compared before and after  
221 implementation of the intervention (27 November 2020). Secondly, we tested the association  
222 between the two process indicators that were the direct target of the new tracing strategy and  
223 the final health outcome (number of secondary cases). Two negative binomial regression  
224 models were constructed with the number of secondary cases per class as outcome and  
225 intervention indicators, tracing delay and known infection source as exposures. Incidence rate  
226 ratios with a 95% confidence interval (CI) were reported. Models were adjusted for types of  
227 school (infant-toddler centre, primary school, middle school, high school, other educational  
228 services), class size ( $<21$  and  $\geq 21$  pupils), and types of index case (student vs. teacher). Given  
229 that tracing delay and known contact were strongly negatively correlated ( $r = -0.76$ ), their  
230 effects were analysed separately.

231 Lastly, a novel effect decomposition method was used in a subset of pre-Alpha variant  
232 (before 31.12.2020) classes to test whether one of the two process indicators mediated the  
233 association between intervention and the number of secondary cases (Supplementary file 3).  
234 The total effect of the intervention on the number of secondary cases is expressed as the  
235 excess relative risk (ERR); i.e., an incidence risk ratio (IRR) from the negative binomial  
236 regression minus one. In the presence of an exposure-mediator interaction ERR is  
237 decomposed into four components: controlled directed effect (CDE) due to intervention only,  
238 at a fixed level of the mediator; pure indirect effect (PIE) due to mediation only; reference  
239 interaction (IntRef) due to interaction only; and mediated interaction (IntMed) due to

240 mediation and interaction [15]. Given that classes could not be randomly assigned to the  
241 intervention and control group, and that the period before the intervention was used for the  
242 comparison, we assume that there might be a significant interaction between the period  
243 before and after intervention and two mediators. Stata's 'Med4way' command was used to  
244 estimate mediation and interaction effects simultaneously [16]. The Stata code used is  
245 provided in the Supplementary file 4. All analyses in this study were conducted using  
246 STATA 13.0 SE (Stata Corporation, Texas, TX).

## 247 **Results**

### 248 *Description of investigated classes and secondary transmission*

249 We investigated 1884 classes overall, 1882 in which at least one case/contact was recorded,  
250 and two classes where screening was done due to out-of-school contact with an index case  
251 from another class. One thousand seven hundred and five secondary cases (1047 students and  
252 658 teachers/staff) were identified among 43214 tested contacts linked to 1604 index cases,  
253 resulting in an overall secondary attack rate of 3.9% (95%CI 3.8-4.1).

254 The median number of secondary cases per class was 1 (IQR 1-3); 2 before, and 1 after the  
255 intervention (test of equal medians 0.83) (Table 1). The proportion of classes where  
256 secondary transmission occurred was overall 38.6%; 37.4% and 39.0% before and after the  
257 intervention, respectively ( $p = 0.51$ ).

258 The number of symptomatic index cases significantly decreased in the period after  
259 intervention from 85.3% to 80% (IRR 0.94 95%CI 0.89-0.98). There were no changes in the  
260 number of classes that made up part of a multi-class cluster, as well as in the type of index  
261 case.

262 **Table 1.** Characteristics of 1 884 classes and 1 604 index cases for which a school contact  
 263 with Covid-19 cases was suspected, before and after the intervention

|                                        | n (%)        | Before<br>intervention<br>n=490 | After<br>intervention<br>n=1394 | RR (95%CI)       | p-value* |
|----------------------------------------|--------------|---------------------------------|---------------------------------|------------------|----------|
| <b>Classes (n=1884)</b>                |              |                                 |                                 |                  |          |
| Type of school                         |              |                                 |                                 |                  |          |
| Infant-toddler centre                  | 350 (18.5)   | 107 (21.8)                      | 243 (17.4)                      | ref              | 0.028    |
| Primary school                         | 540 (28.7)   | 125 (25.5)                      | 415 (29.8)                      | 1.17 (1.03-1.34) |          |
| Middle school                          | 496 (26.3)   | 128 (26.1)                      | 368 (26.4)                      | 1.11 (0.97-1.26) |          |
| High school                            | 478 (25.4)   | 129 (26.3)                      | 349 (25.0)                      | 1.08 (0.94-1.23) |          |
| Other educational services             | 20 (1.1)     | 1 (0.2)                         | 19 (1.4)                        | na               |          |
| Calendar period                        |              |                                 |                                 |                  |          |
| September/October                      | 248 (13.1)   |                                 |                                 |                  |          |
| November                               | 263 (13.9)   |                                 |                                 |                  |          |
| December                               | 316 (16.8)   |                                 |                                 |                  |          |
| January                                | 265 (14.1)   |                                 |                                 |                  |          |
| February                               | 523 (27.8)   |                                 |                                 |                  |          |
| March/April                            | 269 (14.3)   |                                 |                                 |                  |          |
| Class size                             |              |                                 |                                 |                  |          |
| <21                                    | 862 (45.7)   | 191 (39.0)                      | 671 (48.1)                      | ref              | <0.001   |
| ≥21                                    | 1 011 (53.7) | 293 (59.8)                      | 718 (51.5)                      | 0.85 (0.78-0.93) |          |
| Missing                                | 11 (0.6)     | 6 (1.2)                         | 5 (0.4)                         |                  |          |
| Secondary transmission                 |              |                                 |                                 |                  |          |
| No                                     | 1 157 (61.4) | 307 (62.6)                      | 850 (61.0)                      |                  | 0.512    |
| Yes                                    | 727 (38.6)   | 183 (37.4)                      | 544 (39.0)                      |                  |          |
| Number of secondary cases <sup>^</sup> | 1 (1-3)      | 2 (1-3)                         | 1 (1-3)                         |                  | 0.830    |
| Part of a school cluster               |              |                                 |                                 |                  |          |
| No                                     | 1 367 (72.6) | 368 (75.1)                      | 999 (71.7)                      | ref              | 0.142    |
| Yes                                    | 517 (27.4)   | 122 (24.9)                      | 395 (28.3)                      | 1.14 (0.95-1.35) |          |
| Tracing delay <sup>^</sup>             | 3 (2-5)      | 7 (5-10)                        | 3 (2-4)                         | na               | <0.001   |
| Testing delay <sup>^</sup>             | 4 (2-8)      | 5 (3-8)                         | 4 (2-7)                         | na               | <0.001   |
| <b>Index cases (n=1604)</b>            |              |                                 |                                 |                  |          |
| Type of index case                     |              |                                 |                                 |                  |          |
| Student                                | 1 213 (75.6) | 321 (74.8)                      | 892 (75.9)                      | ref              | 0.613    |
| Teacher                                | 391 (24.4)   | 108 (25.2)                      | 283 (24.1)                      | 0.96 (0.79-1.16) |          |
| Index case symptomatic                 |              |                                 |                                 |                  |          |
| No                                     | 298 (18.6)   | 63 (14.7)                       | 235 (20)                        | ref              | 0.018    |
| Yes                                    | 1 306 (81.4) | 366 (85.3)                      | 940 (80)                        | 0.94 (0.89-0.98) |          |
| Potential source of infection          |              |                                 |                                 |                  |          |
| Unknown                                | 814 (50.7)   | 283 (66.0)                      | 531 (45.2)                      | ref              | <0.001   |
| Known                                  | 790 (49.3)   | 146 (34.0)                      | 644 (54.8)                      | 1.61 (1.40-1.86) |          |
| Type of source                         |              |                                 |                                 |                  |          |
| Household outbreak                     | 614 (77.7)   | 97 (66.4)                       | 517 (80.3)                      | ref              | <0.001   |
| Social contact                         | 26 (3.3)     | 7 (4.8)                         | 19 (2.9)                        | 1.03 (0.98-1.09) |          |
| Sport contact                          | 18 (2.3)     | 7 (4.8)                         | 11 (1.7)                        | 1.05 (1.00-1.11) |          |

Unidentifiable contact 132 (16.7) 35 (24.0) 97 (15.1) 1.15 (1.03-1.28)

264 \*Chi-square or Mann Whitney test

265 †Median (IQR), calculated only in classes with secondary transmission

266

267 **Association between intervention and indicators**

268 Overall median tracing delay was 3 days (IQR 2-5), decreasing from 7 (IQR 5-10) in the  
 269 period before intervention to 3.1 (IQR 2-4) days in the period after intervention (Table 1).

270 The testing delay also significantly decreased from 5 to 4 days following the implementation  
 271 of the intervention. The percentage of index cases with a known source of infection was  
 272 49.3%, and it increased from 34% in November to 54.8% in the period after intervention  
 273 (IRR 1.61 95%CI 1.40-1.86). The number of index cases that were part of a household  
 274 outbreak increased from 66.4% before intervention to 80.3% after the intervention. Weekly  
 275 average contact tracing delay decreased while the percentage of known sources of infection  
 276 increased in the period after intervention implementation (Figure 2).

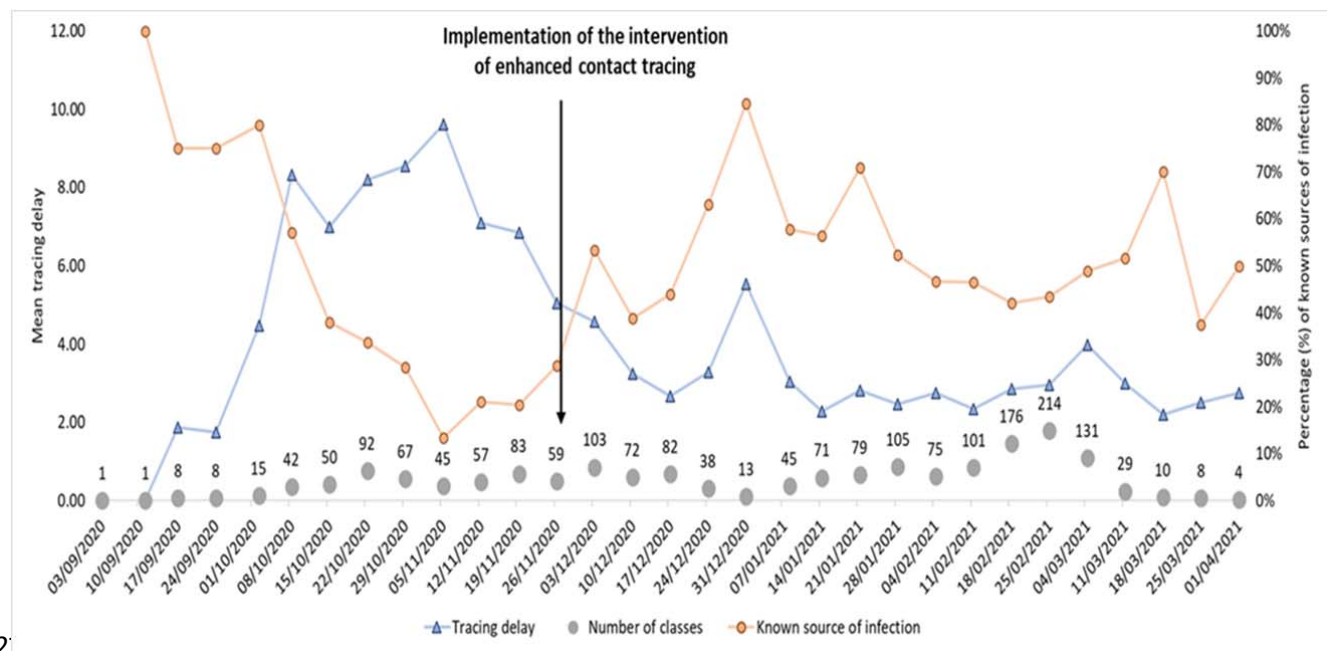

278 **Fig. 2.** Weekly average contact tracing delay and percentage of index cases with a known  
 279 source of infection.

280 Results of negative binomial regression covering the entire period show that both known  
281 source of infection (IRR 0.75 95%CI 0.63-0.91) and decrease in tracing delay (1/IRR 0.97  
282 95%CI 0.94-1.01 per one day of delay) were associated with the decrease of the number of  
283 secondary cases (Table 2). Sensitivity analyses restricted to the period before the spread of  
284 the Alpha variant showed similar results (Table 2).

285 **Table 2.** Negative binomial regression of the association between the number of secondary  
286 cases (outcome) and intervention promptness indicators (exposure)

|                                                | Entire period<br>(n=1 884) |           | Before Alpha variant<br>(n=827) |           |
|------------------------------------------------|----------------------------|-----------|---------------------------------|-----------|
|                                                | IRR*                       | 95%CI     | IRR*                            | 95%CI     |
| Tracing delay                                  | 1.08                       | 0.89-1.30 | 1.23                            | 0.95-1.61 |
| Known source of infection of<br>the index case | 0.75                       | 0.63-0.91 | 0.73                            | 0.55-0.96 |

287 \*Adjusted for the type of school, type of index case, and class size.

288

### 289 *Mediation analysis*

290 Only the known source of infection of the index case was significantly associated with the  
291 outcome (number of secondary cases) in multivariate analysis and it was therefore tested for  
292 the mediation and interaction in the four-way decomposition method.

293 Implementation of prompt contact tracing was associated with a 10% decrease in the number  
294 of secondary cases (EER -0.1 95%CI -0.35 to 0.15) (Table 3). The direct effect of the  
295 intervention accounted for the large part of the excess in risk (EER -0.29 95% -0.61 to 0.03),  
296 leading to the 29% decrease in the number of secondary cases if the source of infection of the  
297 index case is known. Interaction only accounted for the other large part of the excess risk  
298 (EER 0.35 95% 0.03 to 0.68); knowing the source of infection of the index case in the period  
299 before the intervention when tracing delay was high, would significantly increase the risk of  
300 secondary cases by 35%. However, we found evidence of mediated interaction that had a

301 negative effect on the secondary transmission (EER -0.14 95%CI -0.28 to -0.01). The known  
302 source of infection of the index case alone accounted for only a small percent of the reduction  
303 of excess risk (EER -0.02 95% -0.10 to 0.07).

304 **Table 3.** Four-way decomposition mediation analysis of the association between intervention  
305 and number of secondary cases

|                          | ERR*  | 95%CI          | p-value |
|--------------------------|-------|----------------|---------|
| Total effect             | -0.1  | -0.35 to 0.15  | 0.441   |
| Controlled direct effect |       |                |         |
| Known contact (M=1)      | -0.29 | -0.61 to 0.03  | 0.074   |
| Unknown contact (M=0)    | 0.31  | -0.49 to -0.02 |         |
| Pure indirect effect     | -0.02 | -0.10 to 0.07  | 0.709   |
| Mediated interaction     | -0.14 | -0.28 to -0.01 | 0.041   |
| Reference interaction    |       |                |         |
| Known contact (M=1)      | 0.35  | 0.03 to 0.68   | 0.033   |
| Unknown contact (M=0)    | -0.25 | -0.49 to -0.02 | 0.036   |

306 \*Adjusted for the type of school, type of index case, and class size.

307 ERR, excess relative risk; M, mediator.

308

309

## 310 **Discussion**

311 We found that both process indicators used to evaluate contact tracing intervention (tracing  
312 delay and known source of infection of the index case) improved after implementation of the  
313 public health intervention while the median number of secondary cases decreased, despite the  
314 higher daily absolute number of classes investigated in the period after the intervention.

315 However, only the known source of infection of the index case evinced a significant  
316 association with a decrease in secondary transmission in school classes.

317 Our findings are consistent with those of modelling studies reporting that contact tracing  
318 efficacy decreases sharply with increasing delays between symptom onset and tracing and  
319 with a lower fraction of symptomatic infections being tested [8,17,18]. Observational studies  
320 also demonstrated that various improvements in contact tracing [19] can reduce the secondary

321 transmission or even mortality in the community [20], but there is no data on how it reflects  
322 in educational settings.

323 Our results suggest that there is a modest association between the intervention and the  
324 number of secondary cases. It has been shown that the effectiveness of contact tracing highly  
325 depends on the number of cases being traced; i.e., it decreases when the burden of new cases  
326 is too high for the tracing capacity of the health services [17]. In fact, BCT is more effective  
327 when community transmission is low to moderate [21]. Similarly, increased new cases burden  
328 and high transmission during the winter months in our study could be factors that might have  
329 minimised the true effect of the intervention.

330 Interestingly, tracing delay was not significantly associated with the decrease in the  
331 secondary transmission in schools, despite its notable decrease after intervention  
332 implementation. This unexpected finding might be explained by two factors. Firstly, before  
333 the intervention, most classes were put in quarantine immediately independently of the  
334 presence of secondary transmission in the class, considering all classmates as close contacts,  
335 thus, delay in testing was not relevant for secondary transmission in these classes.

336 Furthermore, the unmeasured tracing delay in the family/community better reflects the  
337 intervention efficacy and represents the timeliness in linking SARS-CoV-2 positive children  
338 to the school investigation. A better link between sporadic cases in households to school  
339 exposure after the intervention implementation is also supported by the higher fraction of  
340 asymptomatic index cases identified as well as the higher fraction of index cases that were  
341 part of a household cluster.

342 The direct effect of the intervention would lead to an almost 30% reduction in secondary  
343 transmission if the source of infection of all index cases was known. Moreover, the known  
344 source of infection had a greater impact on the secondary transmission when acting in the



345 interaction with the intervention than independently (14% vs. 2% reduction in the number of  
346 secondary cases).

347 The four-way decomposition analysis also showed that interaction alone accounted for a  
348 considerable part of the excess risk associated with the intervention. This practically means  
349 that knowing the source of infection of the index case in the period before the intervention,  
350 i.e., when contacts are not promptly tested, would have had a substantially detrimental effect  
351 on the secondary cases (35% increase). This possibly reflects that, before the intervention,  
352 often the source of infection for the school index case was identified during the field  
353 investigation and not before, thus, in the absence of BCT, knowing the source of infection is  
354 not a sign of timeliness at all.

355 The major limitation of the study is its before-and-after design; i.e., the impossibility to make  
356 an inference that observed changes are due to intervention and not due to other factors. In  
357 fact, multivariate and mediation analysis may not be enough to control for the fact that the  
358 force of infection was changing over the time series. However, under a public health  
359 emergency, the only way to assess the effectiveness of an intervention is to design an  
360 observational study that minimises the effect of confounding. A possible solution is testing  
361 the effect of mediators strictly linked to the intervention process [22]. We adjusted analyses  
362 for major sources of confounding, but there are still unmeasured confounders. In fact, we  
363 could not classify the preventive measure put in place in each school, the time spent by each  
364 index case in the classroom, or the out-school contacts between classmates. Another  
365 important limitation is the lack of testing delay in a family/community as a process indicator,  
366 that we consider one of the real mechanisms of action of the new tracing strategy (first grey  
367 part of the DAG), but we assume this delay in the community follows the same trend as the  
368 delay observed in schools. Lastly, the same intervention may not yield the same results in a  
369 different epidemiological context, such as the presence of other variants of the virus

370 (Omicron), or different control measures. However, it can have important public health  
371 implications in informing the management of the pandemic and the potential interaction  
372 between control measures in the family and in the school.

373 To our knowledge, this is the only study that attempted to quantify the potential effect of  
374 changing a contact tracing strategy in community on secondary transmission in schools by  
375 estimating the excess risk associated with the intervention, through the application of a new  
376 mediation analysis method which allowed to partition the total excess risk into separate  
377 effects of the intervention and its process indicators in the presence of their interaction  
378 (14,15). As such it can have important methodological implications as well.

### 379 **Conclusion**

380 Changing contact tracing strategy in the community, from testing contacts at the end of  
381 quarantine to testing contacts immediately, reduced the time of contact tracing and increased  
382 the ability to identify the source of infection in school outbreaks. The improvement in tracing  
383 performance appears to be linked to a decrease in the number of secondary cases in school  
384 contacts, although the intervention was implemented in a changing context just after the  
385 incidence peak of the autumn wave, and we cannot exclude that the observed differences are  
386 due to differences in the force of infection and to other control measures put in place before  
387 as the reduction of in presence school attendance.

### 388 **Funding**

389 This project was carried out with the technical and financial support of the Italian Ministry  
390 of Health – CCM 2020 and Ricerca Corrente Annual Program 2023.

### 391 **Declaration of competing Interests**

392 The authors have no relevant financial or non-financial interests to disclose.

393 **Author Contributions**

394 Data curation, formal analysis, methodology, visualization and writing original draft was  
395 performed by Olivera Djuric. Material preparation, data collection and investigation were  
396 performed by Elisabetta Larosa, Mariateresa Cassinadri, Silvia Cilloni, Eufemia Bisaccia,  
397 Davide Pepe and Francesco Venturelli. Investigation, supervision and writing – review &  
398 editing were performed by Massimo Vicentini. Laura Bonvicini contributed to formal  
399 analysis and visualization. Alberto Mateo Urdiales contributed to methodology and formal  
400 analysis. Conceptualization and methodology were done by Paolo Giorgi Rossi, Patrizio  
401 Pezzotti and Emanuela Bedeschi. All authors read and approved the final manuscript.

402 **Ethics approval**

403 The study was approved by the Area Vasta Emilia Nord Ethics Committee on 07/04/2020 n°  
404 2020/0045199.

405 **Data availability statement**

406 According to Italian law, anonymized data can only be made publicly available if there is no  
407 potential for the reidentification of individuals (<https://www.garanteprivacy.it>). Thus, the  
408 data underlying this study are available on request to researchers who meet the criteria for  
409 access to confidential data. In order to obtain data, approval must be obtained from the Area  
410 Vasta Emilia Nord (AVEN) Ethics Committee, who would then authorize us to provide  
411 aggregated or anonymized data. Data access requests should be addressed to the Ethics  
412 Committee at CEReggioemilia@ausl.re.it as well as to the authors at the Epidemiology unit  
413 of AUSL-IRCCS of Reggio Emilia at info.epi@ausl.re.it, who are the data guardians.

414

415 **References**

- 416 1. Winje BA, Ofitserova TS, Brynildsrud OB, Greve-Isdahl M, Bragstad K, Rykkvin R,  
417 Hungnes O, Lund HM, Nygård K, Meijerink H, Brandal LT. Comprehensive Contact  
418 Tracing, Testing and Sequencing Show Limited Transmission of SARS-CoV-2 between  
419 Children in Schools in Norway, August 2020 to May 2021. *Microorganisms*.  
420 2021;9(12):2587. DOI: 10.3390/microorganisms9122587.
- 421 2. Gandini S, Rainisio M, Iannuzzo ML, Bellerba F, Cecconi F, Scorrano L. A cross-  
422 sectional and prospective cohort study of the role of schools in the SARS-CoV-2 second  
423 wave in Italy. *Lancet Reg Health Eur*. 2021;5:100092. DOI:  
424 10.1016/j.lanpe.2021.100092.
- 425 3. Viner R, Waddington C, Mytton O, Booy R, Cruz J, Ward J, Ladhani S, Panovska-  
426 Griffiths J, Bonell C, Melendez-Torres GJ. Transmission of SARS-CoV-2 by children  
427 and young people in households and schools: a meta-analysis of population-based and  
428 contact-tracing studies. *J Infect*. 2022;84(3):361-382. DOI: 10.1016/j.jinf.2021.12.026.
- 429 4. European Centre for Disease Prevention and Control. Contact tracing: public health  
430 management of persons, including healthcare workers, who have had contact with  
431 COVID-19 cases in the European Union – third update, 18 November 2020. Stockholm:  
432 ECDC; 2020. Available at:  
433 [https://www.ecdc.europa.eu/sites/default/files/documents/covid-19-contact-tracing-](https://www.ecdc.europa.eu/sites/default/files/documents/covid-19-contact-tracing-public-health-management-third-update.pdf)  
434 [public-health-management-third-update.pdf](https://www.ecdc.europa.eu/sites/default/files/documents/covid-19-contact-tracing-public-health-management-third-update.pdf). Accessed November 30, 2022.
- 435 5. European Centre for Disease Prevention and Control. Contact tracing in the European  
436 Union: public health management of persons, including healthcare workers, who have  
437 had contact with COVID-19 cases – fourth update, 28 October 2021. Available at:  
438 <https://www.ecdc.europa.eu/en/covid-19-contact-tracing-public-health-management>.  
439 Accessed November 30, 2020.

- 440 6. Centers for Disease Control and Prevention. Considerations for Case Investigation and  
441 Contact Tracing in K-12 Schools and Institutions of Higher Education (IHEs). Last  
442 updated April 22, 2021. Available at: [https://www.cdc.gov/coronavirus/2019-](https://www.cdc.gov/coronavirus/2019-ncov/community/schools-childcare/contact-tracing.html)  
443 [ncov/community/schools-childcare/contact-tracing.html](https://www.cdc.gov/coronavirus/2019-ncov/community/schools-childcare/contact-tracing.html) Accessed November 30, 2020.
- 444 7. Centers for Disease Control and Prevention. Operational Considerations for Adapting a  
445 Contact Tracing Program to Respond to the COVID-19 Pandemic in non-US Settings.  
446 Last updated September 22, 2021. Available at: [https://www.cdc.gov/coronavirus/2019-](https://www.cdc.gov/coronavirus/2019-ncov/global-covid-19/operational-considerations-contact-tracing.html)  
447 [ncov/global-covid-19/operational-considerations-contact-tracing.html](https://www.cdc.gov/coronavirus/2019-ncov/global-covid-19/operational-considerations-contact-tracing.html) Accessed  
448 November 30, 2020.
- 449 8. Kretzschmar ME, Rozhnova G, Bootsma MCJ, van Boven M, van de Wijgert JHHM,  
450 Bonten MJM. Impact of delays on effectiveness of contact tracing strategies for COVID-  
451 19: a modelling study. *Lancet Public Health*. 2020;5(8):e452-e459. DOI: 10.1016/S2468-  
452 2667(20)30157-2.
- 453 9. Endo A, Centre for the Mathematical Modelling of Infectious Diseases COVID-19  
454 Working Group; Leclerc QJ, Knight GM, Medley GF, Atkins KE, Funk S, Kucharski AJ.  
455 Implication of backward contact tracing in the presence of overdispersed transmission in  
456 COVID-19 outbreaks. *Wellcome Open Res*. 2021;5:239. DOI:  
457 10.12688/wellcomeopenres.16344.3.
- 458 10. Raymenants J, Geenen C, Thibaut J, Nelissen K, Gorissen S, Andre E. Empirical  
459 evidence on the efficiency of backward contact tracing in COVID-19. *Nat Commun*.  
460 2022;13(1):4750. DOI: 10.1038/s41467-022-32531-6.
- 461 11. Istituto Superiore di Sanità. Prevalenza e distribuzione delle varianti di SARS-CoV-2 di  
462 interesse per la sanità pubblica in Italia. Rapporto n. 5 del 23 luglio 2021. July 2021. [in  
463 Italian] Available at: [21](https://www.epicentro.iss.it/coronavirus/pdf/sars-cov-2-</a></p></div><div data-bbox=)

- 464 [monitoraggio-varianti-rapporti-periodici-23-luglio-2021.pdf](#) Accessed November 30,  
465 2020.
- 466 12. Larosa E, Djuric O, Cassinadri M, Cilloni S, Bisaccia E, Vicentini M, Venturelli F,  
467 Giorgi Rossi P, Pezzotti P, Bedeschi E; Reggio Emilia Covid-19 Working Group.  
468 Secondary transmission of COVID-19 in preschool and school settings in northern Italy  
469 after their reopening in September 2020: a population-based study. *Euro Surveill.*  
470 2020;25(49):2001911. DOI: 10.2807/1560-7917.ES.2020.25.49.2001911.
- 471 13. Djuric O, Larosa E, Cassinadri M, Cilloni S, Bisaccia E, Pepe D, Vicentini M, Venturelli  
472 F, Bonvicini L, Giorgi Rossi P, Pezzotti P, Mateo Urdiales A, Bedeschi E; Reggio Emilia  
473 Covid-19 Working Group. Surveillance, contact tracing and characteristics of SARS-  
474 CoV-2 transmission in educational settings in Northern Italy, September 2020 to April  
475 2021. *PLoS One.* 2022;17(10):e0275667. DOI: 10.1371/journal.pone.0275667.
- 476 14. Gruppo di Lavoro ISS MdS, Ministero dell'Istruzione, INAIL, Fondazione Bruno  
477 Kessler, Regione Emilia-Romagna, Regione Veneto. Indicazioni operative per la  
478 gestione di casi e focolai di SARS-CoV-2 nelle scuole e nei servizi educativi  
479 dell'infanzia. [in Italian] Published August 21, 2020, last updated February 2, 2021.  
480 [http://www.salute.gov.it/imgs/C\\_17\\_pubblicazioni\\_2944\\_allegato.pdf](http://www.salute.gov.it/imgs/C_17_pubblicazioni_2944_allegato.pdf). Accessed  
481 November 30, 2020.
- 482 15. VanderWeele TJ. A unification of mediation and interaction: a 4-way decomposition.  
483 *Epidemiology.* 2014;25(5):749-61. DOI: 10.1097/EDE.0000000000000121.
- 484 16. Discacciati A, Bellavia A, Lee JJ, Mazumdar M, Valeri L. Med4way: a Stata command  
485 to investigate mediating and interactive mechanisms using the four-way effect  
486 decomposition. *Int J Epidemiol.* 2019; 48(1): 15-20. DOI: 10.1093/ije/dyy236.

- 487 17. Gardner BJ, Kilpatrick AM. Contact tracing efficiency, transmission heterogeneity, and  
488 accelerating COVID-19 epidemics. *PLoS Comput Biol.* 2021; 17(6): e1009122. DOI:  
489 10.1371/journal.pcbi.1009122.
- 490 18. Bradshaw WJ, Alley EC, Huggins JH, Lloyd AL, Esvelt KM. Bidirectional contact  
491 tracing could dramatically improve COVID-19 control. *Nat Commun.* 2021;12(1):232.  
492 DOI: 10.1038/s41467-020-20325-7.
- 493 19. Malheiro R, Figueiredo AL, Magalhães JP, Teixeira P, Moita I, Moutinho MC, Mansilha  
494 RB, Gonçalves LM, Ferreira E. Effectiveness of contact tracing and quarantine on  
495 reducing COVID-19 transmission: a retrospective cohort study. *Public Health.*  
496 2020;189:54-59. DOI: 10.1016/j.puhe.2020.09.012.
- 497 20. Vecino-Ortiz AI, Villanueva Congote J, Zapata Bedoya S, Cucunuba ZM. Impact of  
498 contact tracing on COVID-19 mortality: An impact evaluation using surveillance data  
499 from Colombia. *PLoS ONE.* 2021;16(3): e0246987. DOI:  
500 10.1371/journal.pone.0246987.
- 501 21. Ontario Agency for Health Protection and Promotion (Public Health Ontario). Focus on:  
502 backward contact tracing. Toronto, ON: Queen's Printer for Ontario; 2021. Available at:  
503 [https://www.publichealthontario.ca/-/media/documents/ncov/phm/2021/05/covid-19-](https://www.publichealthontario.ca/-/media/documents/ncov/phm/2021/05/covid-19-backward-contact-tracing.pdf?la=en)  
504 [backward-contact-tracing.pdf?la=en](https://www.publichealthontario.ca/-/media/documents/ncov/phm/2021/05/covid-19-backward-contact-tracing.pdf?la=en) Accessed 16 February 2022.
- 505 22. Accorsi EK, Qiu X, Rumpler E, Kennedy-Shaffer L, Kahn R, Joshi K, Goldstein E,  
506 Stensrud MJ, Niehus R, Cevik M, Lipsitch M. How to detect and reduce potential  
507 sources of biases in studies of SARS-CoV-2 and COVID-19. *Eur J Epidemiol.*  
508 2021;36(2):179-196. DOI: 10.1007/s10654-021-00727-7.
